# Supplementary material for: A Vulnerability Assessment of 300 Species in Florida: Threats from Sea Level Rise, Land Use, and Climate Change
Source: PLoS One. 2013 Nov 19;8(11):e80658. doi: 10.1371/journal.pone.0080658 (PMC3834108; doi:10.1371/journal.pone.0080658)
Supplement: Table S2 — Latin names of species evaluated, organized by taxonomic group. Species names in bold comprise 32 species added to initial sea level rise analysis (see Methods). (XLSX) [file pone.0080658.s002.xlsx]

## Sheet: Sheet1
Amphibians			Belocephalus micanopy		Puma concolor coryi		Lantana canescens
	Ambystoma bishopi		Belocephalus sleighti		Sciurus niger avicennia		Lantana depressa sanibelensis
	Ambystoma cingulatum		Branchus floridanus		Sciurus niger shermani		Leitneria floridana
	Hyla squirella		Cesonia irvingi		Sigmodon hispidus exsputus		Linum arenicola
	Notophthalmus perstriatus		Chlorostrymon maesites		Sigmodon hispidus insulicola		Lomariopsis kunzeana
	Rana capito		Chlorostrymon simaethis		Sorex longirostris eionis		Lupinus westianus
	Rana okaloosae		Chondropoma dentatum		Sylvilagus palustris hefneri		Manilkara jaimiqui
Birds			Cicindela olivacea		Trichechus manatus latirostris		Maxillaria crassifolia
	Ammodramus maritimus fisheri		Cicindela severa		Ursus americanus floridanus		Microgramma heterophylla
	Ammodramus maritimus macgillivraii		Cicindela striga	Plants			Nuphar advena ulvacea
	Ammodramus maritimus mirabilis		Cicindela togata togata		Acrostichum aureum		Odontosoria clavata
	Ammodramus maritimus peninsulae		Cochlodinella poeyana		Ageratum littorale		Okenia hypogaea
	Ammodramus savannarum floridanus		Copris howdeni		Anemia Wrightii		Oncidium floridanum
	Anous stolidus		Cotinis aliena		Argusia gnaphalodes		Opuntia corallicola
	Aphelocoma coerulescens		Cyclargus ammon		Argythamnia blodgettii		Opuntia triacantha
	Ardea herodias occidentalis		Cyclargus thomasi bethunebakeri		Aristolochia pentandra		Passiflora multiflora
	Buteo brachyurus		Cyclocephala miamiensis		Basiphyllaea corallicola		Pavonia paludicola
	Caracara cheriway audubonii		Cycloptilum irregularis		Bourreria radula		Phoradendron rubrum
	Charadrius alexandrinus nivosus		Eburia stroheckeri		Byrsonima lucida		Phyllanthus pentaphyllus floridanus
	Charadrius melodus		Ephyriades brunnea floridensis		Caesalpinia pauciflora		Pilosocereus bahamensis
	Charadrius wilsonia		Eunica tatila tatilista		Calyptranthes zuzygium		Pilosocereus robinii
	Chordeiles gundlachii		Euphyes dukesi calhouni		Campyloneurum angustifolium		Pisonia rotundata
	Cistothorus palustris griseus		Euphyes pilatka klotsi		Canella winteriana		Polygonella macrophylla
	Cistothorus palustris marianae		Eustala eleuthera		Catesbaea parviflora		Polyrrhiza lindenii
	Coccyzus minor		Floridobia fraterna		Celtis iguanaea		Pseudophoenix sargentii
	Dendroica discolor paludicola		Floridobia helicogyra		Celtis pallida		Psidium longipes
	Egretta rufescens		Floridobia parva		Chamaecrista lineata keyensis		Pteris bahamensis
	Egretta tricolor		Geopsammodius hydropicus		Chamaesyce deltoidea pinetorum		Roystonea elata
	Falco columbarius		Geopsammodius subpedalis		Chamaesyce deltoidea serpyllum		Sachsia polycephala
	Fregata magnificens		Goniopsis cruentata		Chamaesyce garberi		Savia bahamensis
	Grus americana		Gronocarus autumnalis		Chamaesyce porteriana		Schaefferia frutescens
	Haematopus palliatus		Gronocarus inornatus		Chrysopsis godfreyi		Scutellaria havanensis
	Hydroprogne caspia		Heraclides aristodemus ponceanus		Chrysopsis gossypina cruisiana		Selaginella eatonii
	Laterallus jamaicensis		Hesperapis oraria		Cienfuegosia yucatanensis		Sideroxylon reclinatum austrofloridense
	Mycteria americana		Heterachthes sablensis		Cladonia perforata		Strumpfia maritima
	Nycticorax nycticorax		Hojeda inaguensis		Coccothrinax argentata		Swietenia mahagoni
	Pandion haliaetus		Junonia genoveva		Colubrina cubensis floridana		Symphoricarpos orbiculatus
	Patagioenas leucocephala		Lasioglossum surianae		Crossopetalum ilicifolium		Tephrosia angustissima corallicola
	Pelecanus occidentalis		Lestes spumarius		Crossopetalum rhacoma		Thelypteris serrata
	Picoides borealis		Lestes tenuatus		Cupania glabra		Thrinax morrisii
	Platalea ajaja		Liguus fasciatus		Digitaria pauciflora		Thrinax radiata
	Rallus longirostris insularum		Linsleyonides albomaculatus		Dodonaea elaeagnoides		Tillandsia flexuosa
	Rallus longirostris scottii		Ministrymon azia		Drypetes diversifolia		Tillandsia pruinosa
	Recurvirostra americana		Nehalennia minuta		Eleocharis rostellata		Tragia saxicola
	Rostrhamus sociabilis plumbeus		Nemopalpus nearcticus		Encyclia boothiana erythronioides		Trema lamarckianum
	Rynchops niger		Orthalicus reses nesodryas		Encyclia cochleata triandra		Trichomanes holopterum
	Setophaga petechia gundlachi		Papilio andraemon bonhotei		Eragrostis pectinacea tracyi		Tripsacum floridanum
	Sterna dougallii		Paraphrynus raptator		Eugenia rhombea		Vallesia antillana
	Sternula antillarum		Polites baracoa		Eupatorium frustratum		Vanilla barbellata
	Thalasseus maximus		Polyphylla woodruffi		Eupatorium villosum		Zanthoxylum coriaceum
	Thalasseus sandvicensis		Procambarus attiguus		Euphorbia pinetorum		Zanthoxylum flavum
	Vireo altiloquus		Procambarus milleri		Exostema caribaeum	Reptiles
Fish			Rutela formosa		Forestiera segregata pinetorum		Caretta caretta
	Acipenser brevirostrum		Strymon acis bartrami		Galactia pinetorum		Chelonia mydas
	Acipenser oxyrinchus desotoi		Strymon martialis		Galeandra bicarinata		Crocodylus acutus
	Acipenser oxyrinchus oxyrinchus		Tetracha floridana		Glandularia maritima		Dermochelys coriacea
	Awaous banana	Mammals			Glandularia tampensis		Diadophis punctatus acricus
	Bairdiella sanctaeluciae		Blarina shermani		Gossypium hirsutum		Drymarchon couperi
	Ctenogobius pseudofasciatus		Eumops floridanus		Guaiacum sanctum		Eretmochelys imbricata
	Ctenogobius stigmaturus		Microtus pennsylvanicus dukecampbelli		Gyminda latifolia		Gopherus polyphemus
	Etheostoma okaloosae		Neotoma floridana smalli		Halophila johnsonii		Graptemys ernsti
	Fundulus jenkinsi		Neovison vison		Harrisia aboriginum		Kinosternon baurii
	Gambusia rhizophorae		Neovison vison halilimnetes		Harrisia simpsonii		Malaclemys terrapin
	Gobiomorus dormitor		Neovison vison lutensis		Helianthus debilis tardiflorus		Malaclemys terrapin rhizophararum
	Menidia conchorum		Odocoileus virginianus clavium		Helianthus debilis vestitus		Nerodia clarkii clarkii
	Microphis brachyurus		Oryzomys palustris natator		Hippomane mancinella		Nerodia clarkii taeniata
	Rivulus marmoratus		Oryzomys palustris planirostris		Hymenocallis godfreyi		Pantherophis guttatus
Invertebrates			Oryzomys palustris sanibeli		Hypelate trifoliata		Plestiodon egregius
	Anaea troglodyta floridalis		Peromyscus gossypinus allapaticola		Ilex krugiana		Plestiodon egregius egregius
	Anomala flavipennis okaloosensis		Peromyscus polionotus allophrys		Indigofera mucronata keyensis		Plestiodon egregius insularis
	Aphaostracon asthenes		Peromyscus polionotus leucocephalus		Ionopsis utricularioides		Plestiodon egregius lividus
	Aphrissa statira		Peromyscus polionotus niveiventris		Ipomoea microdactyla		Plestiodon reynoldsi
	Appias drusilla		Peromyscus polionotus peninsularis		Ipomoea tenuissima		Pseudemys concinna suwanniensis
	Arctosa sanctaerosae		Peromyscus polionotus phasma		Jacquemontia curtissii		Storeria dekayi
	Ataenius scabrelloides		Peromyscus polionotus trissyllepsis		Jacquemontia havanensis		Tantilla oolitica
	Ataenius scabrellus		Procyon lotor auspicatus		Jacquemontia pentanthos		Thamnophis sauritus sackenii
	Ataenius wenzelii		Procyon lotor incautus		Jacquinia keyensis
